# Supplementary material for: Multigram Synthesis of Pure HMF and BHMF
Source: PubMed Central journal article supplement (PMC9594346; doi:10.1021/acs.oprd.2c00196), 2022-09-09

# Supporting Information

## A multi-gram synthesis to pure HMF and BHMF

Giacomo Trapasso, Giovanna Mazzi, Beatriz Chícharo, Mattia Annatelli, Davide Dalla Torre,  
Fabio Aricò

*Dr. G. Trapasso, Dr. M. Annatelli, G. Mazzi, Dr. B. Chícharo, Dr. D. Dalla Torre, Prof. F. Aricò;  
Department of Environmental Sciences Informatics and Statistics, Ca' Foscari University of  
Venice, Via Torino, 155, 30170 Mestre, Venezia (IT).*

## Contents

|                                                                                |    |
|--------------------------------------------------------------------------------|----|
| <b>Catalysts properties overview</b>                                           | 2  |
| <b><sup>1</sup>H-NMR spectra of a typical HMF synthesis at different times</b> | 3  |
| (samples taken from #6 Table 1 reaction)                                       | 3  |
| <b>Additional reactions for the synthesis of HMF in autoclave</b>              | 4  |
| <sup>1</sup> H-NMR of #3, Table S2 in CDCl <sub>3</sub> .                      | 4  |
| <b>Crystallization/Purification of HMF</b>                                     | 5  |
| <b>Green metrics evaluation</b>                                                | 6  |
| Explanation of waste-related Green Metrics:                                    | 6  |
| <b>Comprehensive table for the evaluation of green metrics</b>                 | 7  |
| Ecoscale evaluation.....                                                       | 8  |
| Comparison of Yield, E-factor and PMI of reactions with PMI > 100. ....        | 9  |
| Radical pentagon analysis.....                                                 | 9  |
| <sup>1</sup> NMR and <sup>13</sup> C-NMR spectra .....                         | 14 |

## Catalysts properties overview

**Table S1.** Purolites and Amberlysts properties.

|                       | <b>Amberlyst-15</b>                                     | <b>Amberlyst-36</b>                  | <b>CT151</b>                       | <b>CT269</b>                       | <b>CT275</b>                       |
|-----------------------|---------------------------------------------------------|--------------------------------------|------------------------------------|------------------------------------|------------------------------------|
| Polymer structure     | Macroporous polystyrene crosslinked with divinylbenzene |                                      |                                    |                                    |                                    |
| Appearance            | Spherical Beads                                         |                                      |                                    |                                    |                                    |
| Functional Group      | Sulfonic Acid                                           |                                      |                                    |                                    |                                    |
| Ionic Form            | H <sup>+</sup> form                                     |                                      |                                    |                                    |                                    |
| Particle Size Range   | < 300 μm                                                | 600-850 μm                           |                                    | 425 - 1200 μm                      |                                    |
| Dry Weight Capacity   | ≥ 4.7 eq/kg<br>(H <sup>+</sup> form)                    | ≥ 5.4 eq/kg<br>(H <sup>+</sup> form) | 5.1 eq/kg<br>(H <sup>+</sup> form) | 5.2 eq/kg<br>(H <sup>+</sup> form) | 5.2 eq/kg<br>(H <sup>+</sup> form) |
| Moisture Retention    | ≤ 1.6%<br>(H <sup>+</sup> form)                         | 51 - 57 %<br>(H <sup>+</sup> form)   | 54 - 59 %<br>(H <sup>+</sup> form) | 51 - 57 %<br>(H <sup>+</sup> form) | 51 - 59 %<br>(H <sup>+</sup> form) |
| Surface Area          | 53 m <sup>2</sup> /g                                    | 33 m <sup>2</sup> /g                 | 15 - 25 m <sup>2</sup> /g          | 35 - 50 m <sup>2</sup> /g          | 20 - 40 m <sup>2</sup> /g          |
| Pore Volume           | 0.40 mL/g                                               | 0.20 mL/g                            | 0.15 - 0.30<br>mL/g                | 0.30 - 0.50<br>mL/g                | 0.40 - 0.60<br>mL/g                |
| Average Pore Diameter | 300 Å                                                   | 240 Å                                | 250 - 400 Å                        | 250 - 425 Å                        | 400 - 700 Å                        |
| Temperature Limit     | 120 °C                                                  | 150 °C                               | 150 °C                             | 130 °C                             | 130 °C                             |

a) All Purolite® information is available on <https://www.purolite.com/index>. All Amberlyst-15 information are available on the DuPont (<https://www.dupont.com/content/dam/dupont/amer/us/en/watersolutions/public/documents/en/45-D00927-en.pdf>).

# $^1\text{H}$ -NMR spectra of a typical HMF synthesis at different times (samples taken from #6 Table 1 reaction)

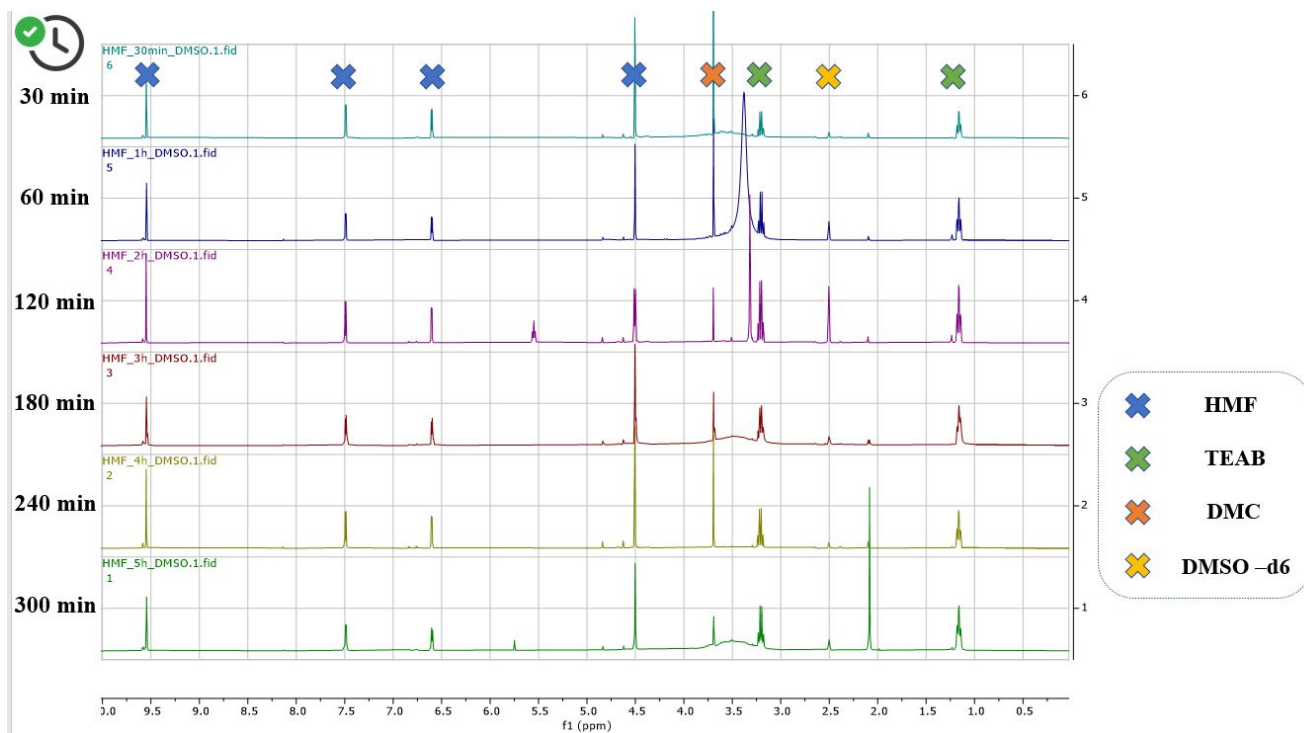

## Additional reactions for the synthesis of HMF in autoclave

Table S2. Synthesis of HMF in autoclave with temperatures higher than 110 °C.

| # | DMC [mL] | TEAB [%] | Purolite CT275DR [%] | T [C°] | Time [h] | <sup>1</sup> H-NMR Selectivity [%] |    |       | HMF <sup>1</sup> H-NMR Yield [%] |
|---|----------|----------|----------------------|--------|----------|------------------------------------|----|-------|----------------------------------|
|   |          |          |                      |        |          | HMF                                | ML | Other |                                  |
| 1 | 40       | 10% wt.  | 5% wt.               | 120    | 2        | 97                                 | 3  | 0     | 68                               |
| 2 | 40       | 10% wt.  | 5% wt.               | 130    | 2        | 96                                 | 4  | 0     | 70                               |
| 3 | 40       | 10% wt.  | 5% wt.               | 150    | 2        | 68                                 | 18 | 16    | 46                               |
| 4 | 40       | 10% wt.  | 5% wt.               | 150    | 4        | 71                                 | 4  | 25    | 60                               |

### <sup>1</sup>H-NMR of #3, Table S2 in CDCl<sub>3</sub>.

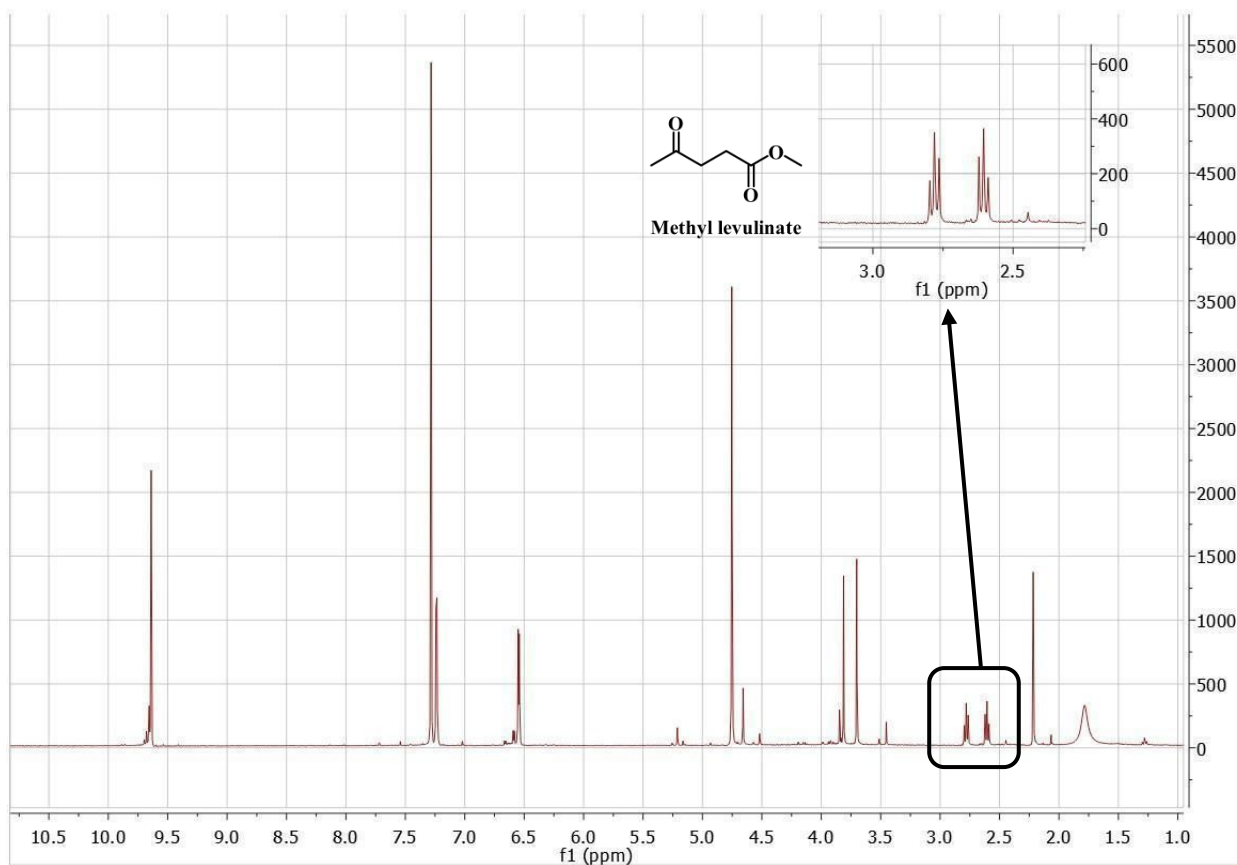

## Crystallization/Purification of HMF

**Table S3.** Solvents used in the HMF crystallization trials.<sup>a</sup>

| #                | Solvent                     | HMF crystals | Crystal yield % | Crystals                                                                                                                             |
|------------------|-----------------------------|--------------|-----------------|--------------------------------------------------------------------------------------------------------------------------------------|
| 1 <sup>b</sup>   | Et <sub>2</sub> O           | ✓            | ca. 50          | Bubble-shape, yellow crystals                     |
| 2 <sup>b,d</sup> | Et <sub>2</sub> O + Hexane  | ✓            | ca. 30          | Needle-shape, yellow-orange crystals.             |
| 3 <sup>c</sup>   | t-butyl methyl ether (TBME) | ✗            | /               | /                                                                                                                                    |
| 4 <sup>c</sup>   | THF                         | ✗            | /               | /                                                                                                                                    |
| 5 <sup>c</sup>   | 2-MeTHF                     | ✗            | /               | /                                                                                                                                    |
| 6 <sup>c</sup>   | Hexane                      | ✗            | /               | /                                                                                                                                    |
| 7 <sup>b</sup>   | Acetone + Hexane            | ✗            | /               | /                                                                                                                                    |
| 8 <sup>b,e</sup> | AcOEt + Hexane              | ✓            | ca. 30          | Needle-shape, yellow-orange. They melt faster.  |
| 9 <sup>c</sup>   | AcOEt                       | ✗            | /               | /                                                                                                                                    |

<sup>a</sup> After obtaining the dark brown reaction crude, solvent(s) was added, the organic phase was collected in a beaker and put in freezer for 48h; <sup>b</sup> Separation between organic phase and dark brown crude oil; <sup>c</sup> Solvent dissolves the dark brown crude oil; <sup>d</sup> 10 mL of Et<sub>2</sub>O were poured in the reaction crude, then hexane was added until the formation of a white-yellow powder; this procedure repeated two more times, the recovered organic phase were then put in the freezer for 48h; <sup>e</sup> Dark brown oil dissolved in 5 mL of AcOEt, then hexane was added until the formation of a white-yellow powder; this procedure repeated two more times, the recovered organic phase were then put in the freezer for 48h.



## Green metrics evaluation

Explanation of waste-related Green Metrics:

- E-kernel: Mass contribution to the total E-factor from reaction by-products, reaction side products, and unreacted starting materials;
- E-reaction solvent (E-rxn solv): Mass of reaction solvent necessary for the synthesis of the target product;
- E-catalyst (E-cat): Mass of the catalyst necessary for the synthesis of the target product;
- E-workup: Mass of the reagents used in the work-up procedures necessary to obtain the target product;
- E-purification (E-purif): Mass of the reagents used in purification procedures necessary to obtain the pure target product;

## Comprehensive table for the evaluation of green metrics

**Table S4.** Environmental assessment of different procedures with PMI lower than 100 (#1-17) and higher than 100 (#18-25).

| #                   | Method <sup>b</sup> | D-Fructose [g] | Catalyst                               | Rxn solvent             | Yield [%] | E-kernel | E-rxn solv. | E-cat | E-workup | E-purif | E-total | PMI                | Ref.                                    |
|---------------------|---------------------|----------------|----------------------------------------|-------------------------|-----------|----------|-------------|-------|----------|---------|---------|--------------------|-----------------------------------------|
| 1*                  | B                   | 0.64           | CeP <sub>3</sub> <sup>c</sup>          | DMC-water               | 68        | 1.11     | 44.43       | 0.33  | 39.6     | 0       | 85.47   | 86.47              | Dibenedetto <i>et al.</i> <sup>28</sup> |
| 2 <sup>d</sup>      | C                   | 1              | HCl 0.25M                              | MIBK                    | 74.3      | 0.92     | 23.02       | 21.54 | 0        | 0       | 45.48   | 46.48              | Brasholz <i>et al.</i> <sup>29</sup>    |
| 3*                  | B                   | 1              | FeCl <sub>3</sub> /Et <sub>4</sub> NBr | NMP <sup>e</sup>        | 78        | 0.83     | 18.83       | 0.55  | 67.29    | 0       | 87.5    | 88.5               | Tong <i>et al.</i> <sup>30</sup>        |
| 4* <sup>f</sup>     | B                   | 1.8            | HBr/silica                             | THF                     | 95        | 0.5      | 88.8        | 4.01  | 0.83     | >>0     | 94.14   | 95.14              | Rajmohan <i>et al.</i> <sup>31</sup>    |
| 5 <sup>d</sup>      | B                   | 2.1            | Ti/Si500                               | Dist water/TEAC         | 95.2      | 0.5      | 7.14        | 0.14  | 5.64     | 0       | 13.42   | 14.42              | Novamont <sup>32</sup>                  |
| 6 <sup>g</sup>      | B                   | 5              | [PPFPy][HSO <sub>4</sub> ]             | DMSO                    | 82.7      | 0.73     | 30.4        | 0.92  | 7.6      | 0       | 39.65   | 4.17 <sup>h</sup>  | Shi <i>et al.</i> <sup>33</sup>         |
| 7                   | B                   | 5              | [PPFPy][HSO <sub>4</sub> ]             | DMSO                    | 82.7      | 0.73     | 30.4        | 0.92  | 7.6      | 0       | 39.65   | 40.65              | Shi <i>et al.</i> <sup>33</sup>         |
| 8 <sup>g</sup>      | B                   | 5              | [PPFPy][HSO <sub>4</sub> ]             | DMSO                    | 84.4      | 0.69     | 29.79       | 0.9   | 59.58    | 0       | 90.97   | 57.34 <sup>h</sup> | Shi <i>et al.</i> <sup>33</sup>         |
| 9                   | B                   | 5              | [PPFPy][HSO <sub>4</sub> ]             | MIBK/water              | 83        | 0.72     | 28.86       | 0.92  | 5.49     | 0       | 35.99   | 36.99              | Shi <i>et al.</i> <sup>33</sup>         |
| 10 <sup>f,i</sup>   | A                   | 5              | CO <sub>2</sub>                        | H <sub>2</sub> O        | 92        | 0.55     | 5.59        | 0     | 0        | 0       | 6.14    | 7.14               | Motokucho <i>et al.</i> <sup>34</sup>   |
| 11 <sup>d,i</sup>   | B                   | 10             | H <sub>2</sub> SO <sub>4</sub> /LiBr   | DMAc                    | 45.3      | 2.15     | 29.56       | 3.26  | 21.34    | 0       | 56.31   | 57.31              | Kovash <i>et al.</i> <sup>35</sup>      |
| 12 <sup>g</sup>     | A                   | 10             | Pur CT275DR                            | DMC                     | 50.3      | 2.03     | 12.96       | 0.45  | 27.3     | 6.49    | 49.24   | 14.25              | This work                               |
| 13                  | A                   | 10             | Pur CT275DR                            | DMC                     | 72        | 0.98     | 8.45        | 0.3   | 17.8     | 0       | 27.53   | 5.13               | This work                               |
| 14* <sup>f</sup>    | B                   | 10             | Amb-15                                 | CH <sub>3</sub> CN:TEAC | 78        | 0.82     | 21.27       | 2.18  | 7.19     | 0       | 31.46   | 32.46              | Brown <i>et al.</i> <sup>36</sup>       |
| 15*                 | B                   | 20             | Amb-15                                 | DMC:TEAB                | 70        | 1.04     | 17.45       | 0.61  | 5.52     | 0       | 24.62   | 25.62              | Musolino <i>et al.</i> <sup>14</sup>    |
| 16*                 | B                   | 20             | Amb-15                                 | water                   | 91        | 0.57     | 0.7         | 7.28  | 86.84    | 0       | 95.39   | 96.39              | Simeonov <i>et al.</i> <sup>9</sup>     |
| 17*                 | B                   | 20             | BF <sub>3</sub> OEt <sub>2</sub>       | DMC                     | 76        | 0.89     | 16.14       | 0.53  | 2.55     | 0       | 20.11   | 21.11              | Musolino <i>et al.</i> <sup>14</sup>    |
| 18 <sup>m,i,g</sup> | B                   | 1.5            | H <sub>2</sub> SO <sub>4</sub>         | [BMIM][Cl]              | 78        | 0.83     | 8.55        | 0.02  | 605.74   | 34.68   | 649.81  | 650.81             | Galkin <i>et al.</i> <sup>22</sup>      |
| 19 <sup>m</sup>     | B                   | 1.5            | H <sub>2</sub> SO <sub>4</sub>         | [BMIM][Cl]              | 78        | 0.83     | 8.55        | 0.02  | 605.74   | 0       | 615.13  | 616.13             | Galkin <i>et al.</i> <sup>22</sup>      |
| 20*                 | B                   | 9              | Cationic resin/activate carbon         | water                   | 48        | 1.97     | 49.5        | 19.8  | 260.4    | 0       | 331.67  | 332.67             | Vinke <i>et al.</i> <sup>37</sup>       |
| 21*                 | B                   | 18             | BF <sub>3</sub> OEt <sub>2</sub>       | DMSO-toluene            | 60        | 1.37     | 26.41       | 0.29  | 67.74    | 153.79  | 249.60  | 250.60             | Musau <i>et al.</i> <sup>38</sup>       |
| 22 <sup>m,i,g</sup> | B                   | 18             | H <sub>2</sub> SO <sub>4</sub>         | [BMIM][Cl]              | 72.9      | 0.96     | 7.83        | 0.02  | 647.79   | 37.03   | 693.69  | 694.69             | Galkin <i>et al.</i> <sup>22</sup>      |
| 23 <sup>m</sup>     | B                   | 18             | H <sub>2</sub> SO <sub>4</sub>         | [BMIM][Cl]              | 72.9      | 0.96     | 7.83        | 0.02  | 647.79   | 0       | 656.61  | 657.61             | Galkin <i>et al.</i> <sup>22</sup>      |
| 24* <sup>n</sup>    | C                   | 70             | WCl <sub>6</sub> /HY                   | [BMIM]Cl/THF            | 55        | 1.62     | 170.04      | 0.27  | 0        | 0       | 171.93  | 172.93             | Chan <i>et al.</i> <sup>39</sup>        |

<sup>a</sup> E-excess is not reported in the table as its value was zero for all the synthetic procedure reported; the reported metrics do not consider the preparation of the catalyst; procedures signed by a star were already reported in our previous article [13] <sup>b</sup> A = Autoclave, B = Batch, C = Continuous flow; <sup>c</sup> CeP<sub>3</sub> is Cerium Phosphate catalyst with formula [(Ce(PO<sub>4</sub>)1.5(H<sub>2</sub>O)(H<sub>3</sub>O)0.5(H<sub>2</sub>O)<sub>0.5</sub>)]<sub>3</sub>; <sup>d</sup> Amounts of work-up and/or purification materials are not reported in the original article; <sup>e</sup> NMP = N-Methyl-2-pyrrolidone; <sup>f</sup> Excluding column chromatography; <sup>g</sup> Including purification; <sup>h</sup> DMSO is partially recovered; <sup>i</sup> Reaction conducted for 148 h; <sup>j</sup> NHC is 1,3-bis(2,6-diisopropylbenzyl)imidazolyliidene; <sup>m</sup> Aqueous solution of NaCl/NaHCO<sub>3</sub> not included; <sup>n</sup> Reaction conducted in continuous biphasic system over a 42 h period where 7 cycles of 10 g each of D-fructose run at 6 h intervals were combined.



## Ecoscale evaluation

**Table S5.** Ecoscale scores for the selected procedures for HMF synthesis and isolation.

| Reference                             | Amount of D-fructose<br>g | Ecoscale value | Comments                                                                                                                                                                                  |
|---------------------------------------|---------------------------|----------------|-------------------------------------------------------------------------------------------------------------------------------------------------------------------------------------------|
| Brasholz <i>et al.</i> <sup>29</sup>  | 1.00                      | 56             | Continuous flow reaction                                                                                                                                                                  |
| Galkin <i>et al.</i> <sup>22</sup>    | 1.5                       | 76             | Purification included                                                                                                                                                                     |
| Novamont <sup>32</sup>                | 2.10                      | 89             | Ti/Si 500 (catalyst) not included                                                                                                                                                         |
|                                       |                           | 67             | Reagent for catalyst synthesis included<br>[PPFPy][HSO <sub>4</sub> ] not included, DMSO recovered by distillation from reaction crude                                                    |
| Shi <i>et al.</i> <sup>33</sup>       | 5.00                      | 83             | Reagent for catalyst synthesis included<br>[PPFPy][HSO <sub>4</sub> ] not included, DMSO recovered by distillation from reaction crude                                                    |
|                                       |                           | 36             | Reagent for catalyst synthesis included<br>[PPFPy][HSO <sub>4</sub> ] not included, DMSO recovered by distillation from reaction crude; purification by AcOEt/H <sub>2</sub> O extraction |
| Shi <i>et al.</i> <sup>33</sup>       | 5.00                      | 81             | Reagent for catalyst synthesis included                                                                                                                                                   |
|                                       |                           | 34             | MIBK/water extraction                                                                                                                                                                     |
| Shi <i>et al.</i> <sup>33</sup>       | 5.00                      | 82             | Reagent for catalyst synthesis included                                                                                                                                                   |
|                                       |                           | 32             | Reaction performed for 168 h in autoclave; amount of CO <sub>2</sub> employed not specified                                                                                               |
| Motokucho <i>et al.</i> <sup>34</sup> | 5.00                      | 80             | HMF isolated as yellow liquid                                                                                                                                                             |
| Kovash <i>et al.</i> <sup>35</sup>    | 10                        | 43             | Purolite not available in the database (Amb-15 used instead of Purolite)                                                                                                                  |
| This work with purif. (50 % yield)    | 10                        | 60             | Purolite not available in the database (Amb-15 used instead of purolite)                                                                                                                  |
| This work, no purif. (72% yield)      | 10                        | 71             | Large-scale reaction in rotatory evaporator                                                                                                                                               |
| Galkin <i>et al.</i> <sup>22</sup>    | 18                        | 71             |                                                                                                                                                                                           |

## Comparison of Yield, E-factor and PMI of reactions with PMI > 100.

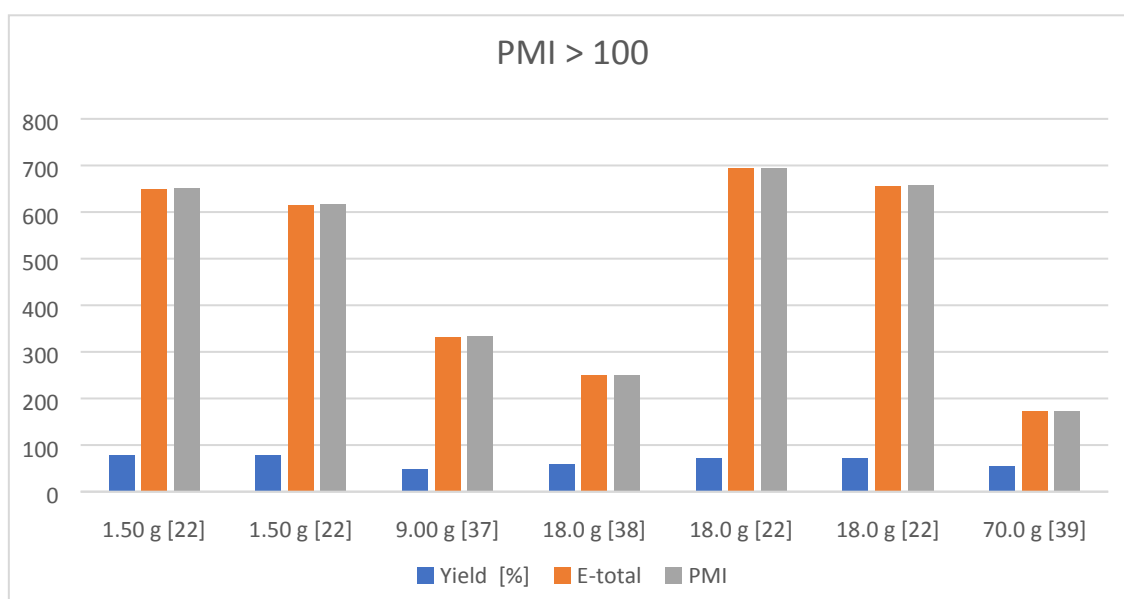

**Figure S1.** Comparison of yield %, E-total and Process Max Intensity (PMI) of procedures with PMI higher than 100; with the amount of D-Fructose employed below each set of bars.

## Radical pentagon analysis

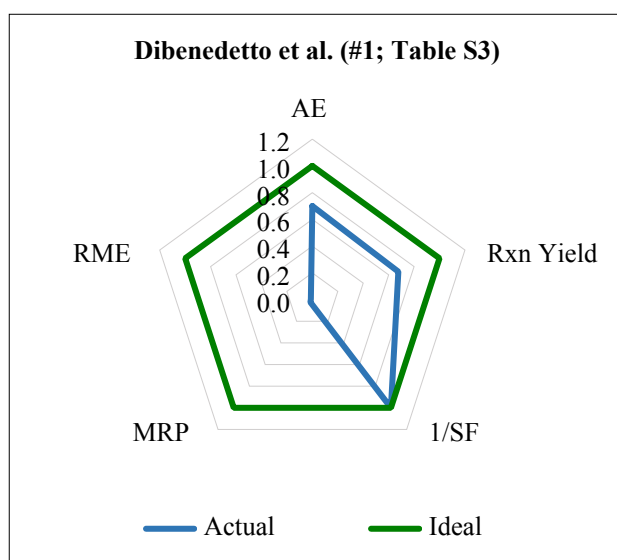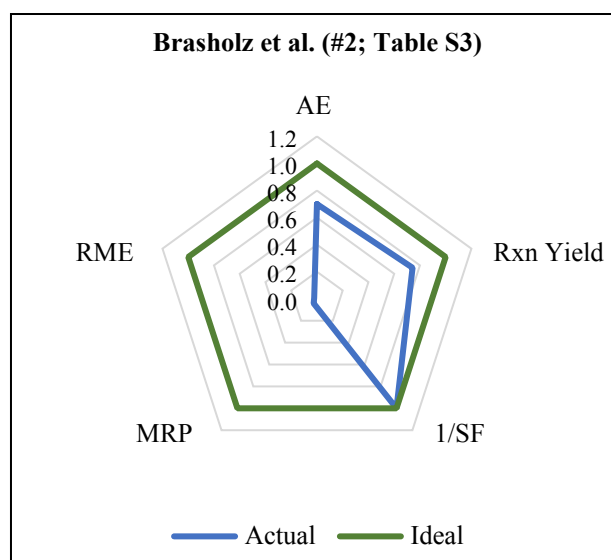

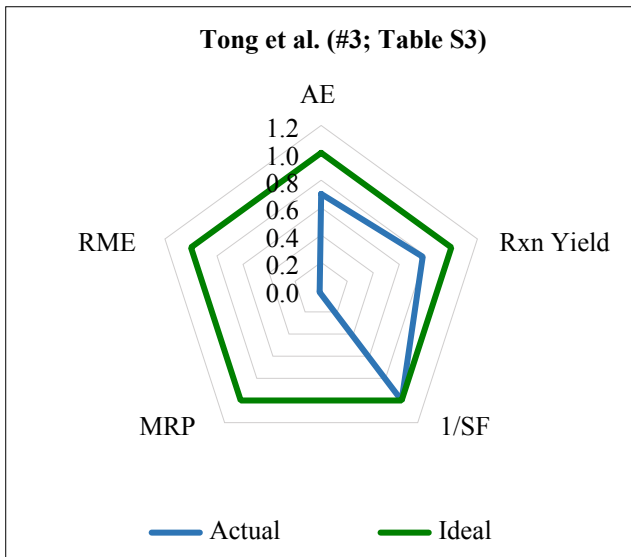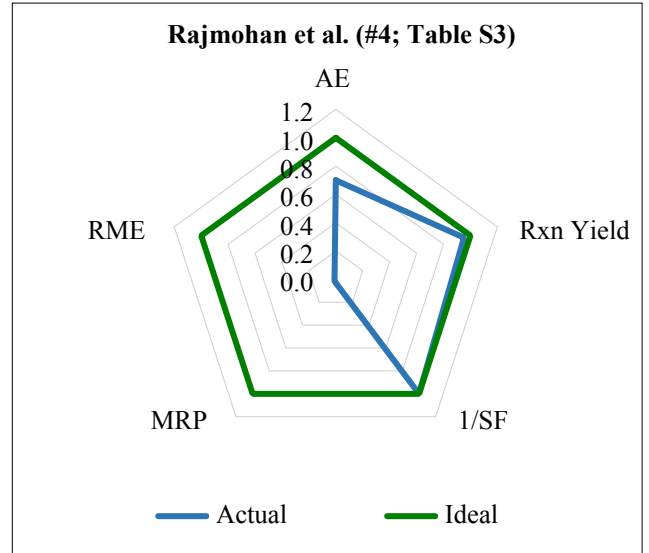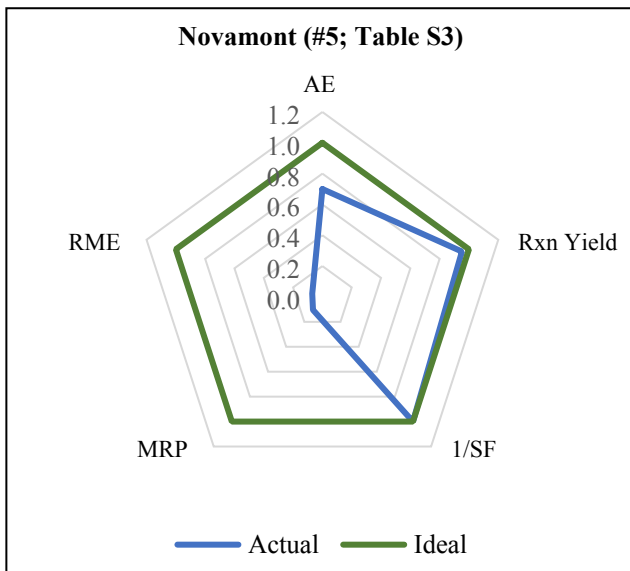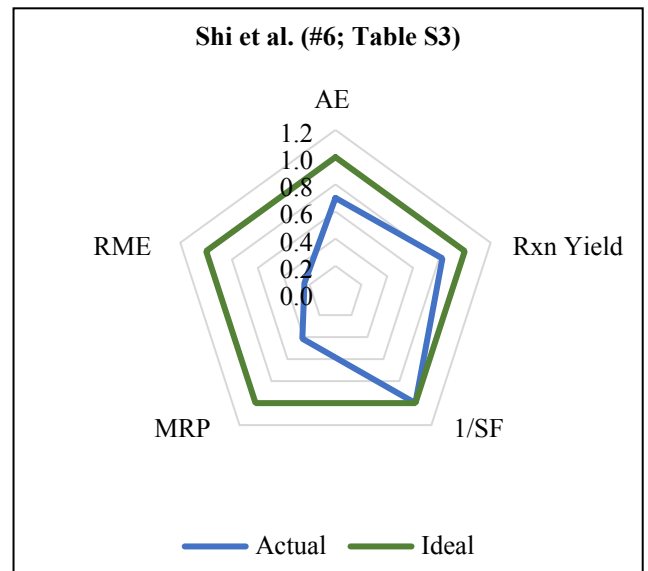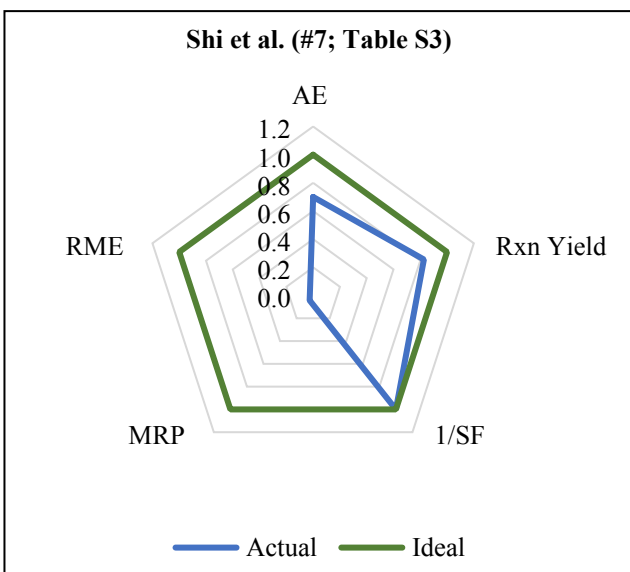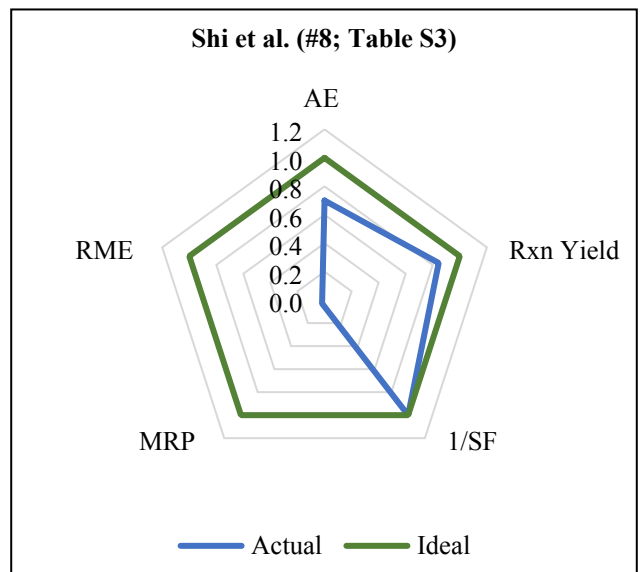

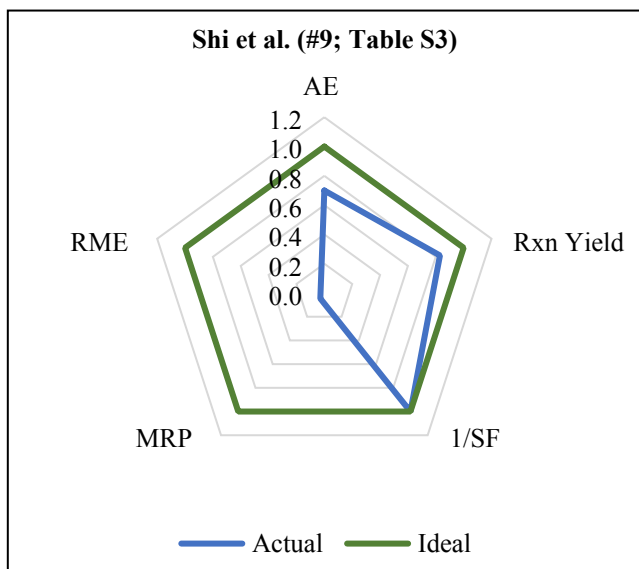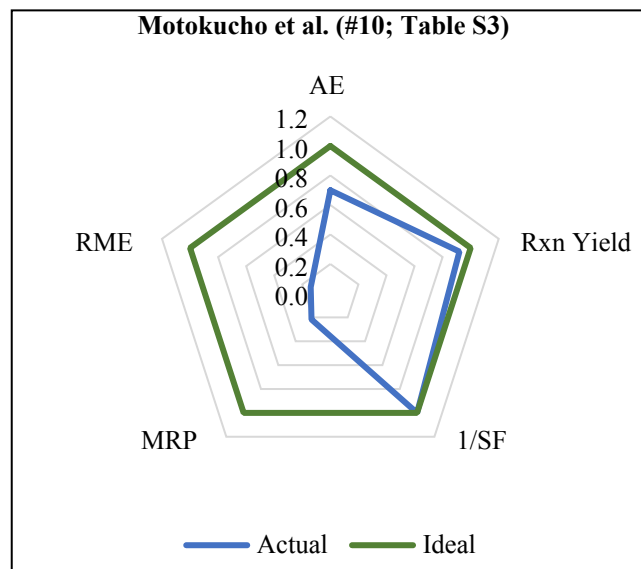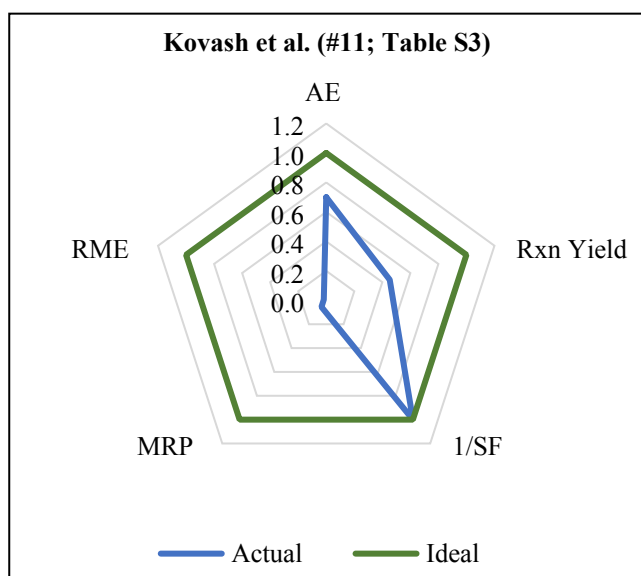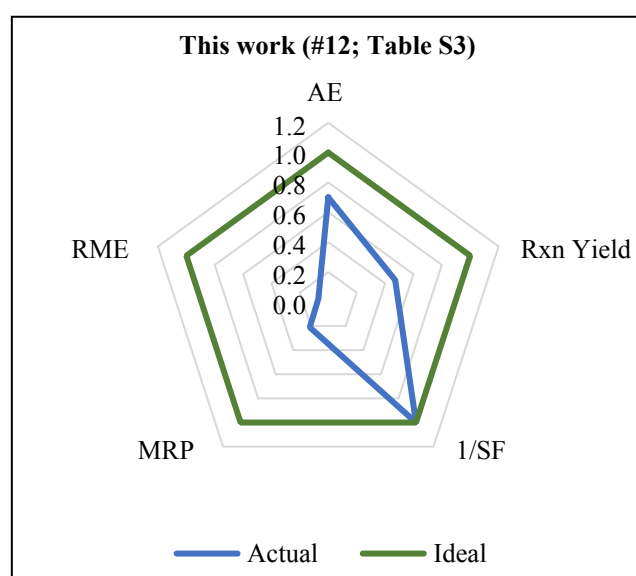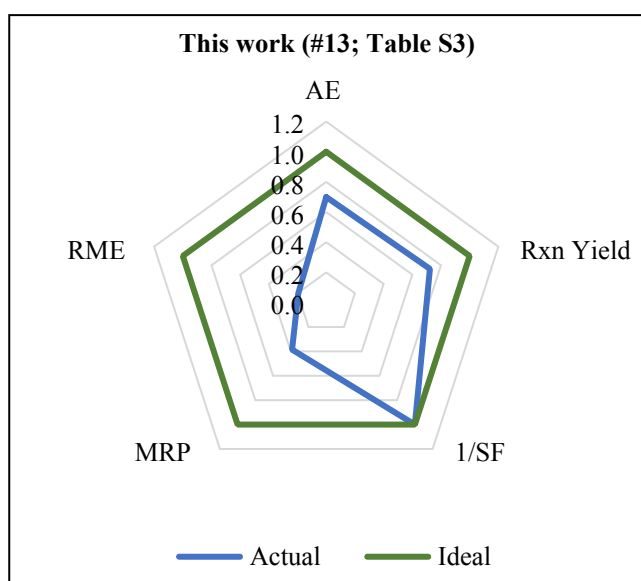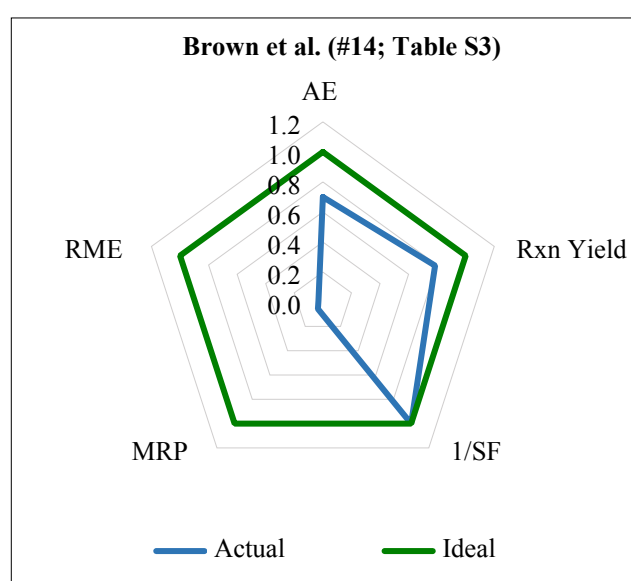

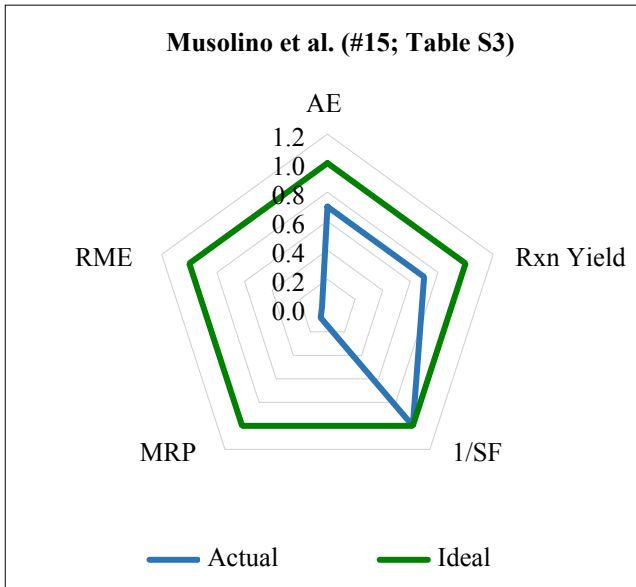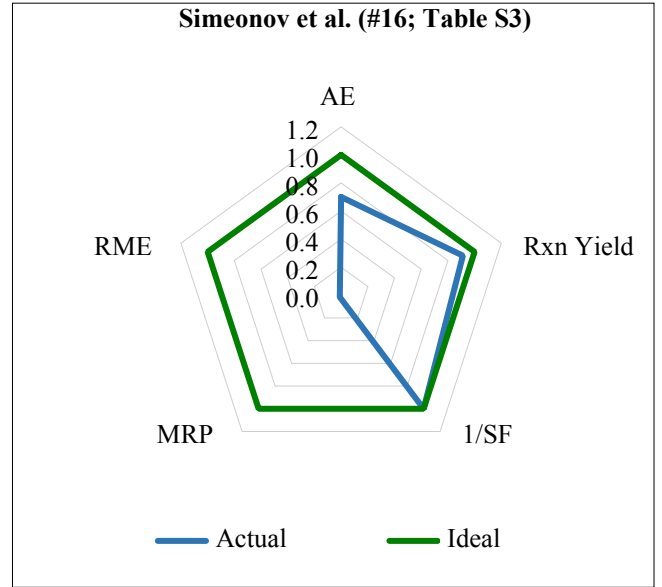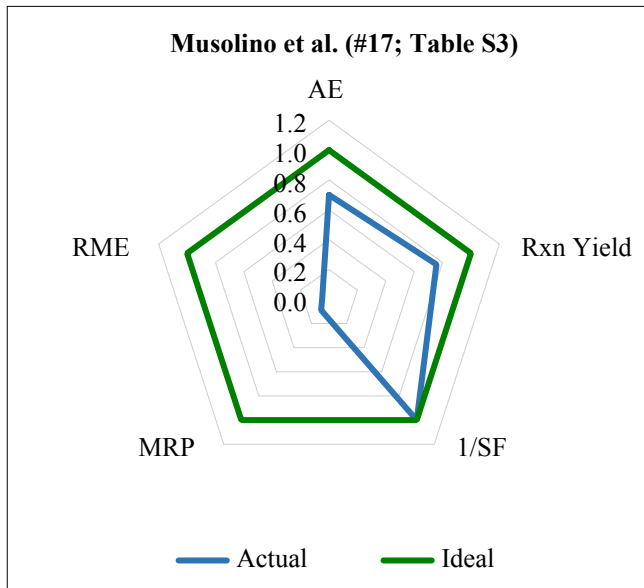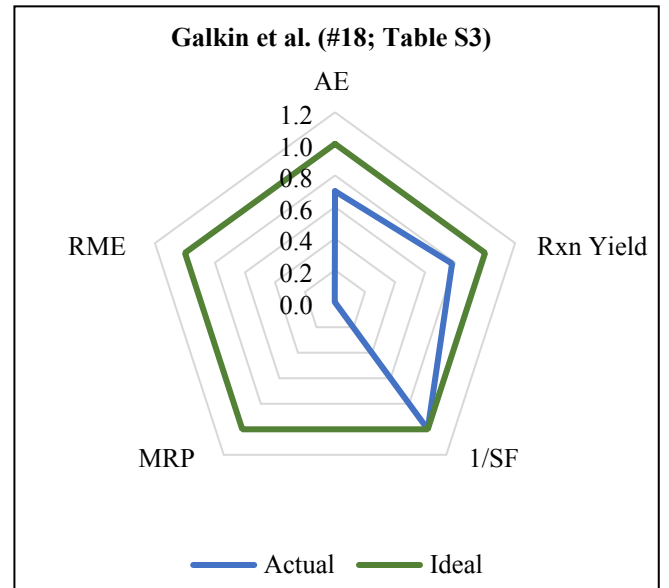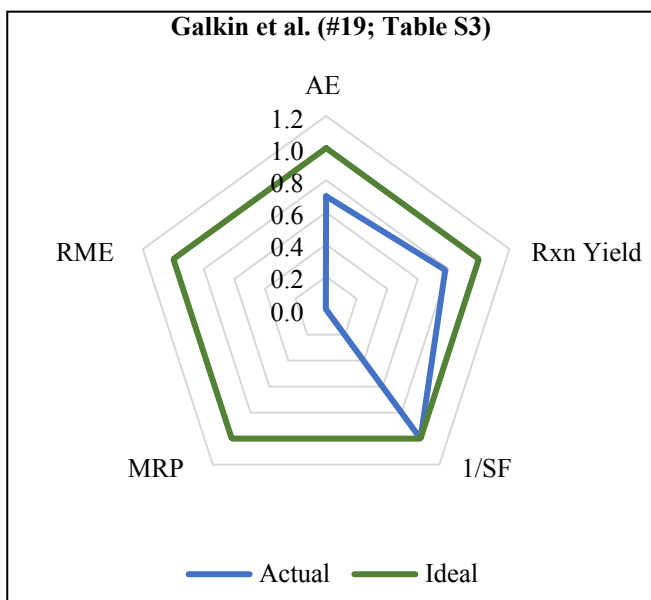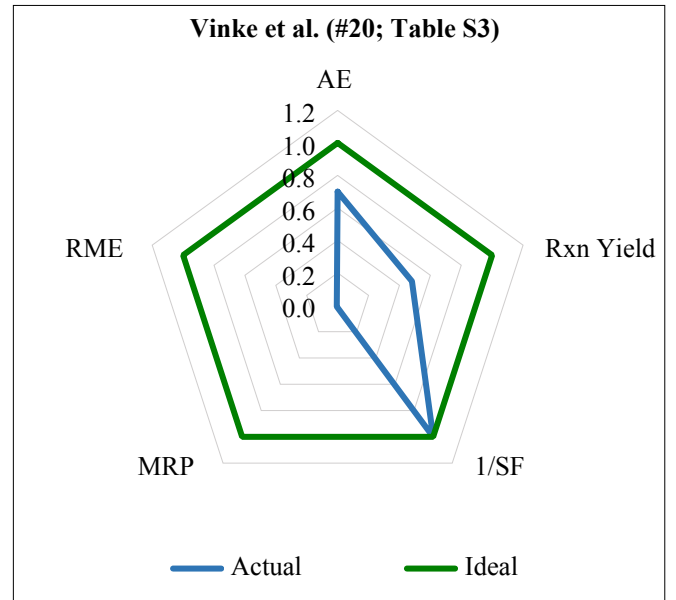

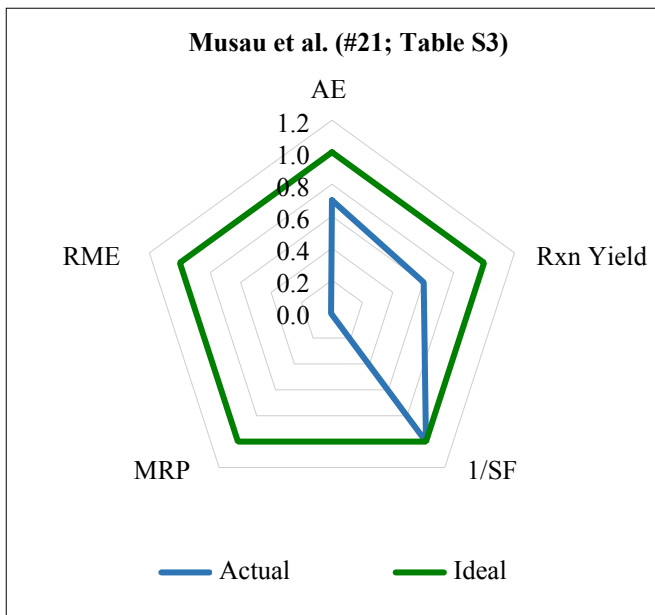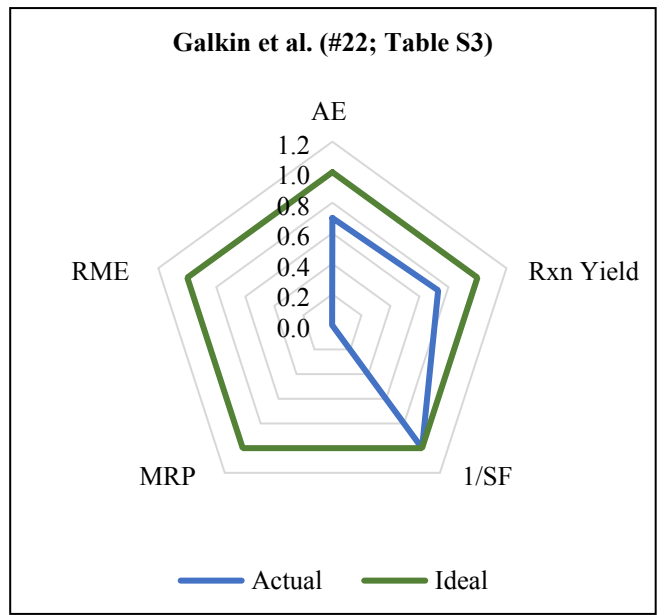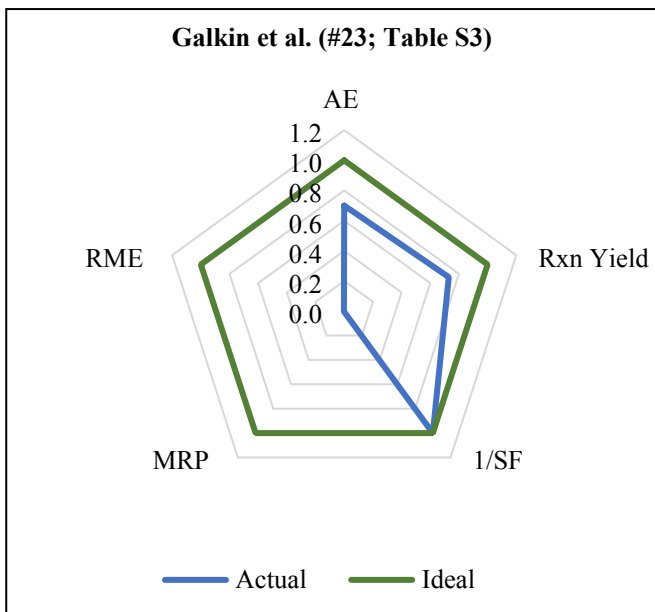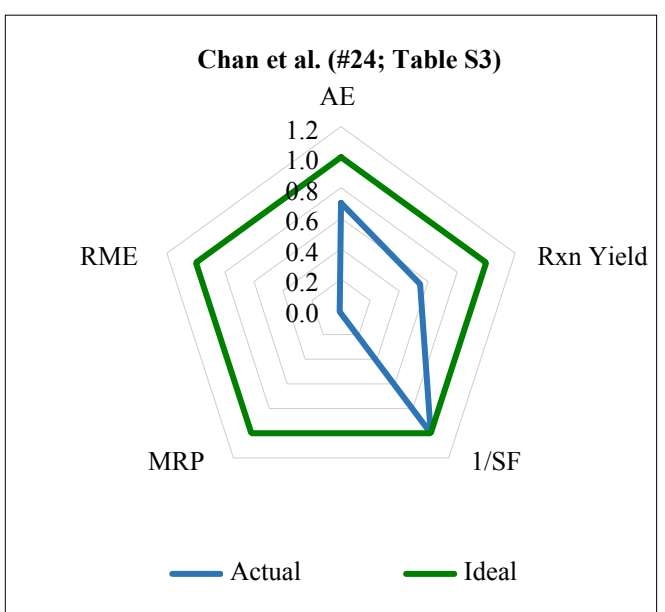

# $^1\text{H}$ -NMR and $^{13}\text{C}$ -NMR spectra

## 5-hydroxymethylfurfural (HMF) in $\text{CDCl}_3$

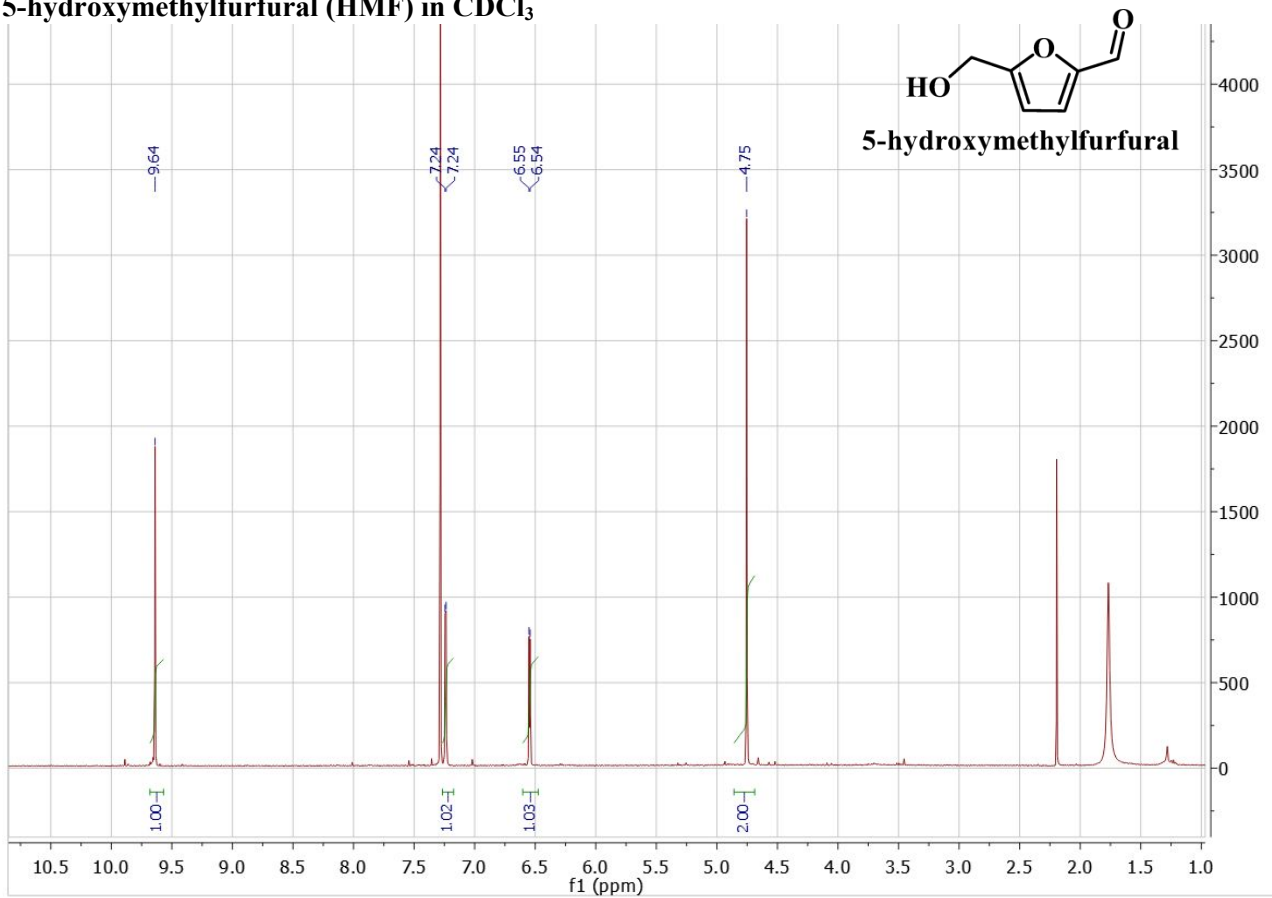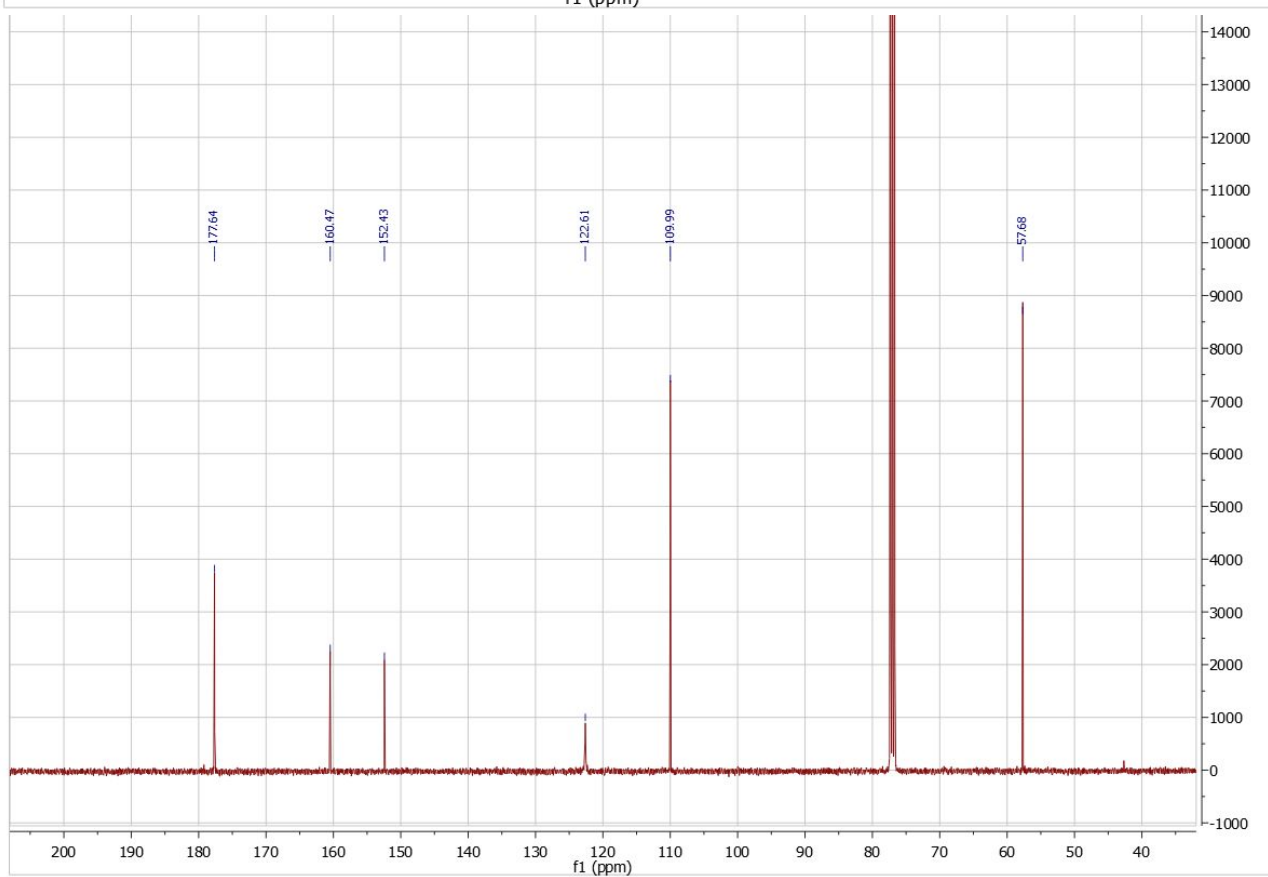

# Bis-(hydroxymethyl)furan (BHMF) in MeOD

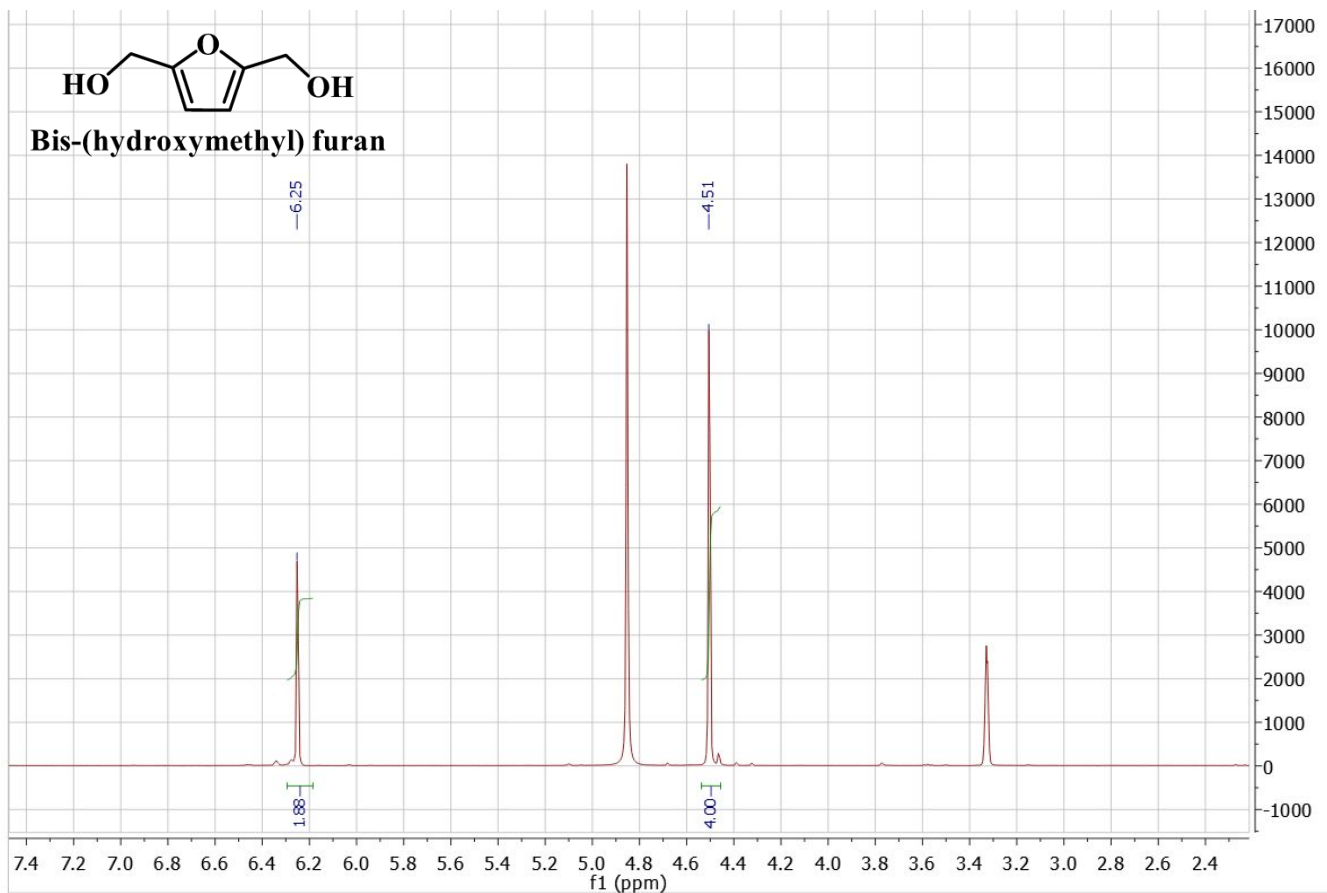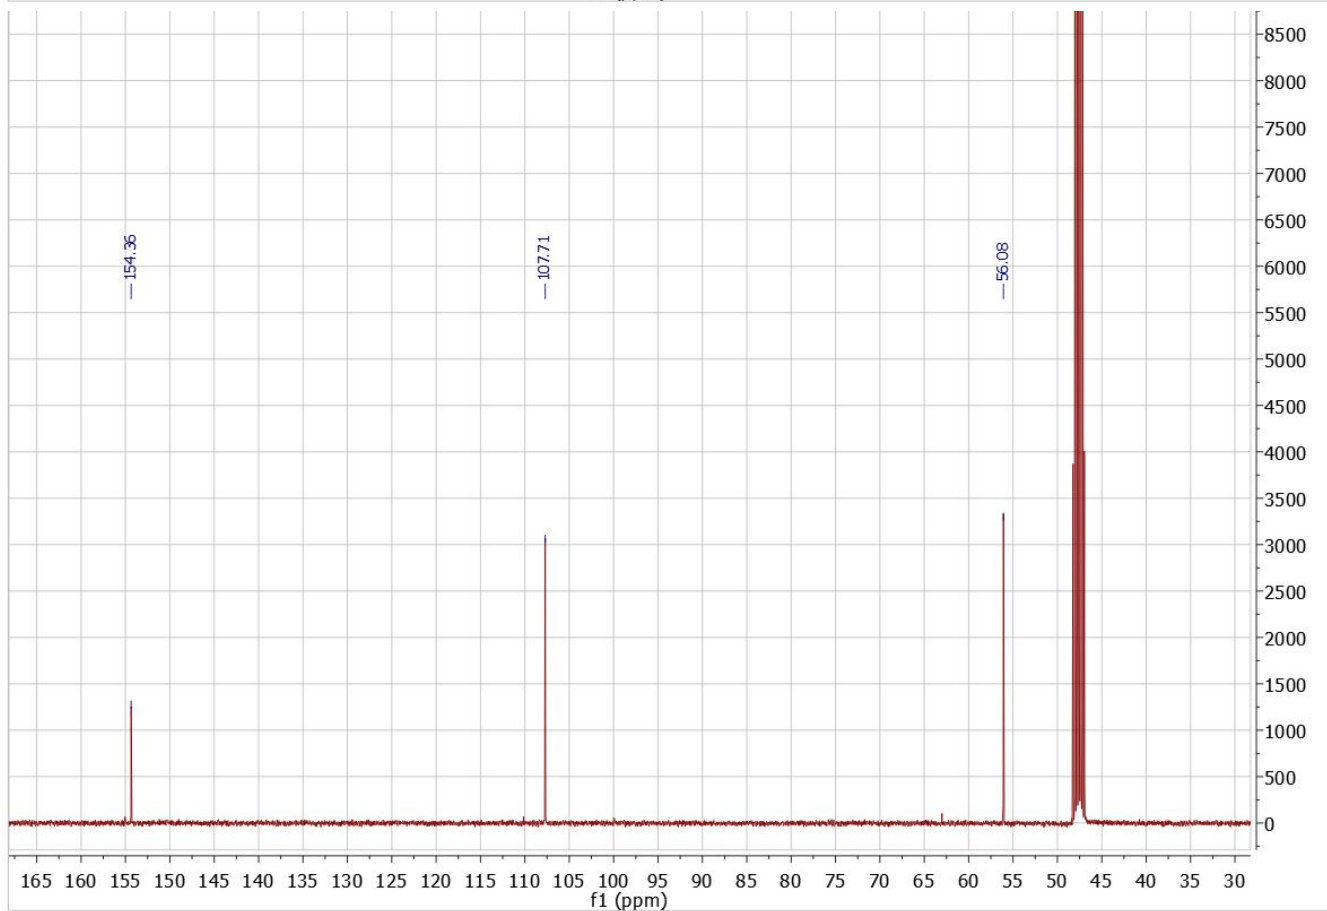



Dark-brown HMF-rich oil in CDCl<sub>3</sub>

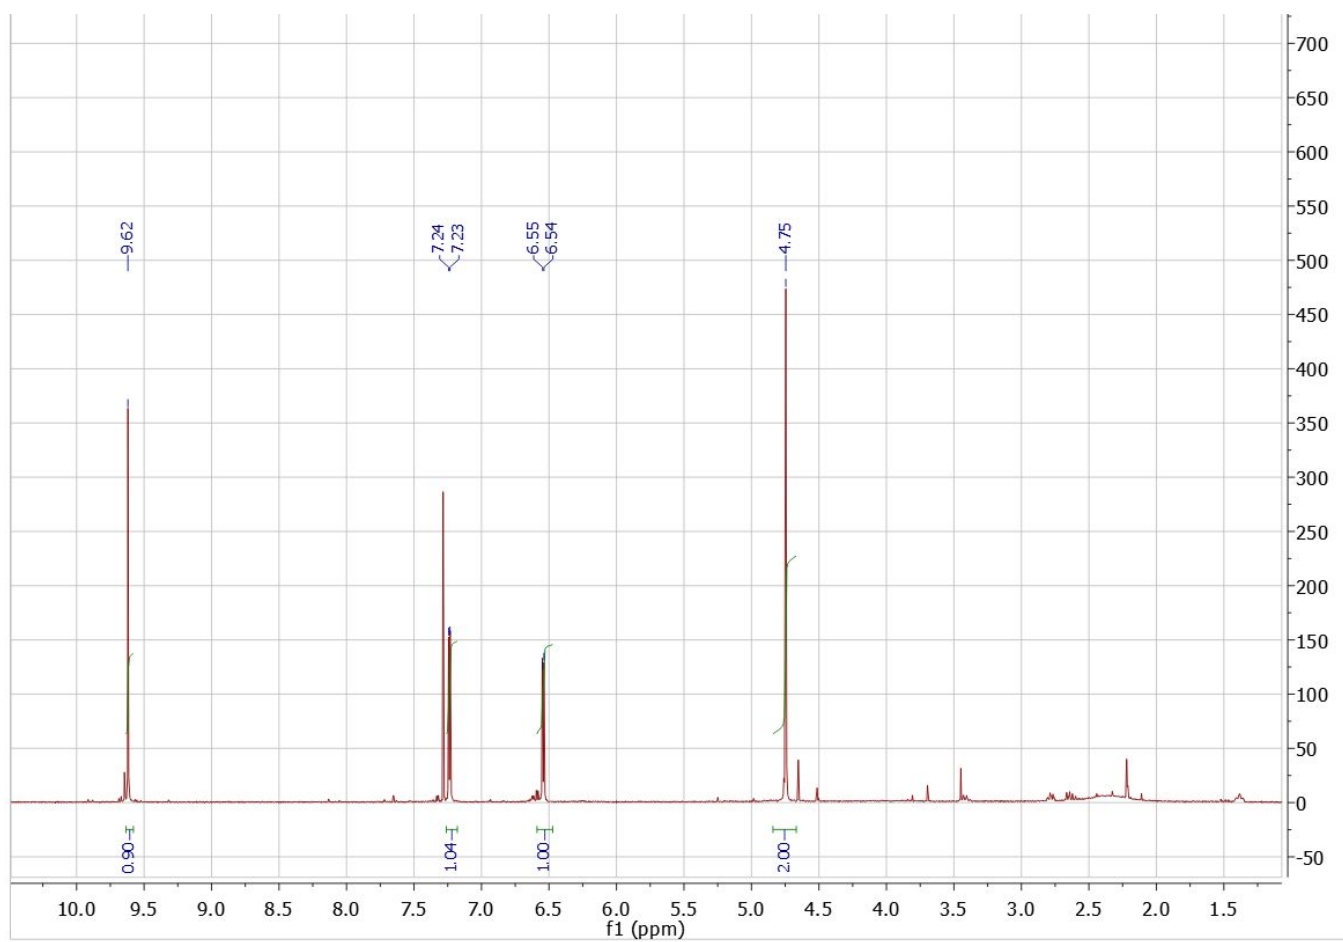

Supplement: op2c00196_si_001.pdf [file op2c00196_si_001.pdf]
